# Supplementary material for: Atomic force microscopy reveals morphological and mechanical properties of schistosoma mansoni tegument
Source: PubMed Central journal article supplement — Sci Rep. 2024 Oct 4;14:23055. doi: 10.1038/s41598-024-74056-6 (PMC11452522; doi:10.1038/s41598-024-74056-6), 2024-10-04
Supplement: 41598_2024_74056_MOESM1_ESM.pdf [file 41598_2024_74056_MOESM1_ESM.pdf]

# Atomic Force Microscopy Reveals Morphological and Mechanical Properties of *Schistosoma mansoni* Tegument

Adriane M. C. Dantas<sup>1</sup>, Fernanda S. Teixeira<sup>1</sup>, Raissa L. Oblitas<sup>1</sup>, Wagner W. R. Araújo<sup>1</sup>, Monique C. Amaro<sup>2</sup>, Rayssa A. Cajas<sup>2</sup>, Josué de Moraes<sup>2,3</sup>, Maria C. Salvadori<sup>1</sup>

<sup>1</sup>Instituto de Física, Universidade de São Paulo, São Paulo, SP, 05508090, Brazil.

<sup>2</sup>Núcleo de Pesquisas em Doenças Negligenciadas, Universidade Guarulhos, Guarulhos, SP 07023-070, Brazil.

<sup>3</sup>Núcleo de Pesquisas em Doenças Negligenciadas, Instituto Científico e Tecnológico, Universidade Brasil, São Paulo, SP, 08230-030, Brazil.

\*Corresponding authors: [moraesnpdn@gmail.com](mailto:moraesnpdn@gmail.com) (J.d.M.); [mcsalva@if.usp.br](mailto:mcsalva@if.usp.br) (M.C.S).

## Supplementary Material

In addition to the results presented in the main manuscript, we have also analyzed *Schistosoma mansoni* (*S. mansoni*) treated with the antischistosomal drug praziquantel using AFM (PF-QNM mode), similar to our approach with AFA fixative. The supplementary material includes elastic modulus data for worms exposed to various concentrations of praziquantel, compared to control worms (**Figure S1**).

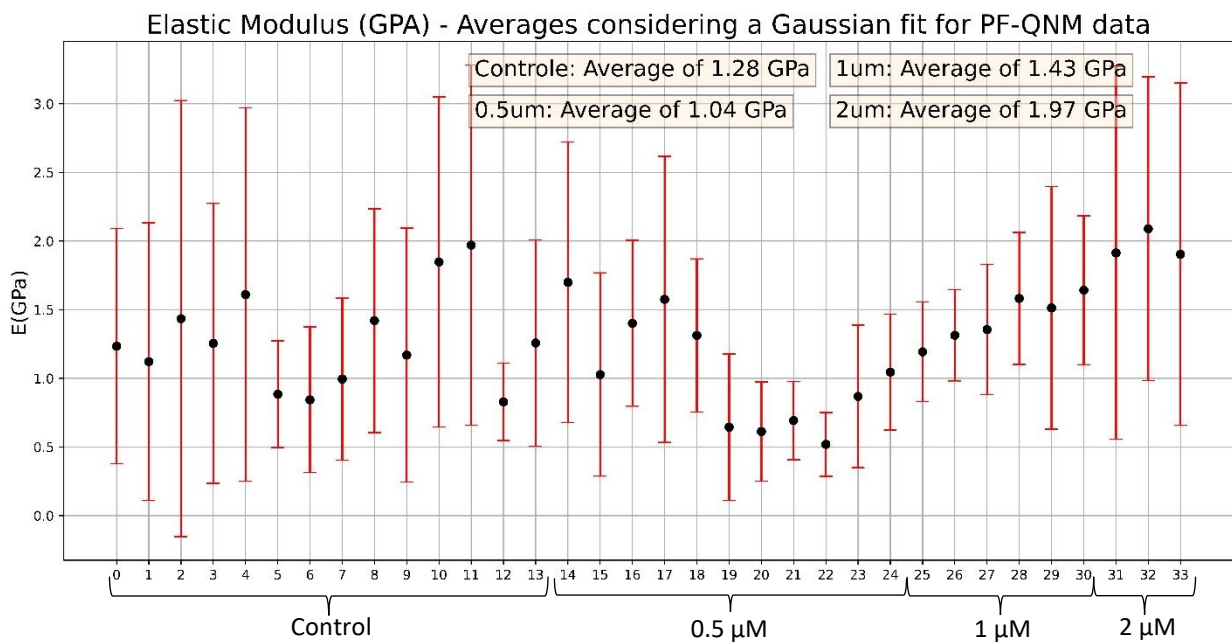

**Figure S1.** Average elastic modulus values obtained from PF-QNM force curves of *S. mansoni*, comparing control worms with those exposed to praziquantel at concentrations of 0.5, 1, and 2  $\mu\text{M}$ .

The data in **Figure S1** indicate that the elastic modulus of *S. mansoni* increases with higher praziquantel concentrations. This observation supports the importance of measuring elastic modulus as a key parameter in assessing the impact of praziquantel treatment.
